# Supplementary material for: COVID-19 Incidence Proportion as a Function of Regional Testing Strategy, Vaccination Coverage, and Vaccine Type
Source: MDPI journal article supplement (doi:10.3390/v15112181), 2023-10-30
Supplement: s1 [file s1]

## Supplementary Materials

**Table S1. Initial data set (n=104).**

| Country                                | Population | Population density.<br>per km <sup>2</sup> | PCR testing coverage,<br>‰ | Reported COVID-19<br>cases,<br>per 1 million<br>population | Vaccination<br>coverage. % | mRNA Vaccines (V1), % |         | Vector Vaccines<br>(V2), % |                                        |                              |         | Protein, Peptide<br>Vaccines<br>(V3), % | Whole-virion,<br>Inactivated<br>Vaccines<br>(V4), %                    | Beginning of<br>national<br>vaccination<br>company | Reported<br>COVID-19<br>cases,<br>per 1 million<br>population<br>before<br>beginning of<br>vaccination | Reported COVID-<br>19 cases,<br>Reported COVID-<br>19 cases,<br>per 1 million<br>population after<br>beginning of<br>vaccination |
|----------------------------------------|------------|--------------------------------------------|----------------------------|------------------------------------------------------------|----------------------------|-----------------------|---------|----------------------------|----------------------------------------|------------------------------|---------|-----------------------------------------|------------------------------------------------------------------------|----------------------------------------------------|--------------------------------------------------------------------------------------------------------|----------------------------------------------------------------------------------------------------------------------------------|
|                                        |            |                                            |                            |                                                            |                            | Pfizer / BioNTech     | Moderna | Johnson &<br>Johnson       | Oxford /<br>AstraZeneca,<br>Covishield | Sputnik V<br>(Gam-COVID-Vac) | CanSino |                                         |                                                                        |                                                    |                                                                                                        |                                                                                                                                  |
| Australia                              | 25500000   | 3.3                                        | 2755                       | 266595                                                     | 83.29                      | 55.37                 | 0       | 0                          | 44.63                                  | 0                            | 0       | 0                                       | 0                                                                      | 21/02/2021                                         | 1105                                                                                                   | 265490                                                                                                                           |
| Austria                                | 9006000    | 108.7                                      | 20551                      | 480347                                                     | 75.8                       | 80.65                 | 8.68    | 1.99                       | 8.63                                   | 0                            | 0       | Novavax – 0.05                          | 0                                                                      | 08/01/2021                                         | 41364                                                                                                  | 438983                                                                                                                           |
| Algeria                                | 43851000   | 18.1                                       | n/d                        | 6183                                                       | 16.0                       | 0                     | 0       | 0                          | Oxford / AstraZeneca                   | Sputnik V                    | 0       | 0                                       | Sinovac<br>Sinopharm                                                   | 29/01/2021                                         | 2369                                                                                                   | 3814                                                                                                                             |
| Angola                                 | 32866000   | 25.5                                       | 47                         | 3197                                                       | 25.3                       | 0                     | 0       | 0                          | 100                                    | 0                            | 0       | 0                                       | 0                                                                      | 01/03/2021                                         | 585                                                                                                    | 2612                                                                                                                             |
| Argentina                              | 46403000   | 16.4                                       | 791                        | 202500                                                     | 86.1                       | 17.16                 | 7.62    | 0                          | 26.08                                  | 20.19                        | 0.78    | 0                                       | Sinopharm –<br>28.16                                                   | 29/12/2020                                         | 36361                                                                                                  | 166139                                                                                                                           |
| Armenia                                | 2963000    | 103.9                                      | 1040                       | 143006                                                     | 32.6                       | 0.8                   | 16.1    | 0                          | 18.8                                   | 16.3                         | 0       | 0                                       | Sinopharm –<br>43.3<br>CoronaVac – 4.7                                 | 31/03/2021                                         | 69283                                                                                                  | 73723                                                                                                                            |
| Aruba                                  | 107000     | 590.6                                      | n/d                        | 323358                                                     | 77.0                       | 100                   | 0       | 0                          | 0                                      | 0                            | 0       | 0                                       | 0                                                                      | 29/03/2021                                         | 85225                                                                                                  | 238133                                                                                                                           |
| Belarus                                | 9449000    | 46.6                                       | 1400                       | 104411                                                     | 63.8                       | 0                     | 0       | 0                          | 0                                      | 57.4                         | 0       | EpiVacCorona –<br>0.3                   | Sinovac – 0.6<br>Sinopharm –<br>32.3<br>Covivac – 0.5                  | 28/12/2020                                         | 19778                                                                                                  | 84633                                                                                                                            |
| Belgium                                | 11590000   | 381.1                                      | 2920                       | 357100                                                     | 81.23                      | 70.15                 | 16.92   | 1.69                       | 11.24                                  | 0                            | 0       | Novavax – <0.01                         | 0                                                                      | 28/12/2020                                         | 54940                                                                                                  | 302160                                                                                                                           |
| Bulgaria                               | 6948000    | 64.5                                       | 1442                       | 165900                                                     | 28.7                       | 65.99                 | 11.31   | 11.81                      | 10.89                                  | 0                            | 0       | 0                                       | 0                                                                      | 29/12/2020                                         | 29105                                                                                                  | 136795                                                                                                                           |
| Caribbean<br>Netherlands               | 26000      | 79.2                                       | n/d                        | 386501                                                     | 61.4                       | 100                   |         | 0                          | 0                                      | 0                            | 0       | 0                                       | 0                                                                      | 09/04/2021                                         | 54635                                                                                                  | 331866                                                                                                                           |
| British Virgin<br>Islands              | 30000      | 200.2                                      | n/d                        | 222777                                                     | 59.2                       | 0                     | 0       | 100                        |                                        | 0                            | 0       | 0                                       | 0                                                                      | 21/05/2021                                         | 7915                                                                                                   | 214862                                                                                                                           |
| Burkina Faso                           | 20903000   | 74.3                                       | n/d                        | 1001                                                       | 8.89                       | 0                     | 0       | Johnson &<br>Johnson       | Oxford / AstraZeneca                   | 0                            | 0       | 0                                       | Sinopharm                                                              | 02/06/2021                                         | 593                                                                                                    | 408                                                                                                                              |
| Burundi                                | 11891000   | 449                                        | 127                        | 3821                                                       | 0.1                        | 0                     | 0       | Johnson &<br>Johnson       |                                        | 0                            | 0       | 0                                       | Sinopharm                                                              | 19/10/2021                                         | 1298                                                                                                   | 2523                                                                                                                             |
| Bhutan #                               | 772000     | 20                                         | 2170                       | 80378                                                      | 90.46                      | 0                     | 50      | 0                          | 50                                     | 0                            | 0       | 0                                       | 0                                                                      | 26/03/2021                                         | 1113                                                                                                   | 79265                                                                                                                            |
| Great Britain                          | 67886000   | 279.1                                      | 7348                       | 331660                                                     | 79.0                       | 48.7                  | 3       | 0                          | 48.3                                   | 0                            | 0       | 0                                       | 0                                                                      | 10/01/2021                                         | 46584                                                                                                  | 285076                                                                                                                           |
| Hungary                                | 9660000    | 107                                        | 1136                       | 195400                                                     | 62.9                       | 58.63                 | 6.54    | 2.07                       | 7.64                                   | 11.03                        | 0       | 0                                       | Sinopharm –<br>14.09                                                   | 18/01/2021                                         | 35443                                                                                                  | 159957                                                                                                                           |
| Venezuela                              | 28436000   | 32.3                                       | n/d                        | 16244                                                      | 50.2                       | 0                     | 0       | 0                          | 0                                      | Sputnik V                    |         | Abdala                                  | Sinopharm<br>Soberana 02<br>Soberana Plus                              | 17/02/2021                                         | 4732                                                                                                   | 11512                                                                                                                            |
| Gambia                                 | 2417000    | 232                                        | n/d                        | 5111                                                       | 14.0                       | 0                     | 0       | Johnson &<br>Johnson       | Oxford / AstraZeneca                   | 0                            | 0       | 0                                       | Sinopharm                                                              | 09/03/2021                                         | 1793                                                                                                   | 3318                                                                                                                             |
| Ghana                                  | 31073000   | 133.7                                      | 77                         | 5328                                                       | 19.7                       | 0                     | 0       | 0                          |                                        | 100                          | 0       | 0                                       | 0                                                                      | 01/03/2021                                         | 2520                                                                                                   | 2808                                                                                                                             |
| Guinea-Bissau                          | 1968000    | 68.3                                       | 68                         | 5139                                                       | 17.4                       | 0                     | 0       | 0                          | Oxford / AstraZeneca                   | 0                            | 0       | 0                                       | Sinopharm                                                              | 12/05/2021                                         | 1777                                                                                                   | 3362                                                                                                                             |
| Germany                                | 83784000   | 239.6                                      | 1536                       | 308600                                                     | 78.5                       | 73.72                 | 17.11   | 2.06                       | 7.04                                   | 0                            | 0       | Novavax – 0.07                          | 0                                                                      | 27/12/2020                                         | 25706                                                                                                  | 282894                                                                                                                           |
| China Hong Kong                        | 7497000    | 7082.1                                     | 5981                       | 161440                                                     | 83.79                      | 58.99                 | 0       | 0                          | 0                                      | 0                            | 0       | 0                                       | Sinovac – 41.01                                                        | 22/02/2021                                         | NA                                                                                                     | 161440                                                                                                                           |
| Greenland                              | 57000      | 0.1                                        | n/d                        | 213459                                                     | 50.2                       | 0                     | 100     | 0                          | 0                                      | 0                            | 0       | 0                                       | 0                                                                      | 27/01/2021                                         | 531                                                                                                    | 212928                                                                                                                           |
| Denmark                                | 5792000    | 136                                        | 11080                      | 538246                                                     | 84.1                       | 84.27                 | 14.07   | 0.38                       | 1.28                                   | 0                            | 0       | 0                                       | 0                                                                      | 18/12/2020                                         | 21049                                                                                                  | 517197                                                                                                                           |
| Democratic<br>Republic of the<br>Congo | 89561000   | 38.3                                       | 11                         | 978                                                        | 0.6                        | 0                     | 0       | 0                          | 100                                    | 0                            | 0       | 0                                       | 0                                                                      | 18/04/2021                                         | 292                                                                                                    | 686                                                                                                                              |
| Zambia                                 | 18384000   | 24                                         | 183                        | 17958                                                      | 16                         | 0                     | 0       | Johnson &<br>Johnson       | Oxford / AstraZeneca                   | 0                            | 0       | 0                                       | Sinopharm                                                              | 14/04/2021                                         | 4515                                                                                                   | 13443                                                                                                                            |
| Zimbabwe                               | 14863000   | 37.9                                       | 152                        | 16537                                                      | 30.1                       | 0                     | 0       | 0                          | Oxford / AstraZeneca                   | Sputnik V                    | 0       | 0                                       | Sinovac<br>Sinopharm                                                   | 18/02/2021                                         | 2170                                                                                                   | 14367                                                                                                                            |
| Israel                                 | 8656000    | 393.7                                      | 5459                       | 449351                                                     | 66.6                       | 100                   |         | 0                          | 0                                      | 0                            | 0       | 0                                       | 0                                                                      | 19/12/2020                                         | 39477                                                                                                  | 409874                                                                                                                           |
| India                                  | 1380004000 | 459.6                                      | 604                        | 31708                                                      | 63.9                       | 0                     | 0       | 0                          | 79.97                                  | 0                            | 0       | Corbevax – 3.25                         | Covaxin – 16.78                                                        | 15/01/2021                                         | 7429                                                                                                   | 24279                                                                                                                            |
| Iran                                   | 83993000   | 50.9                                       | 607                        | 86766                                                      | 68.8                       | 0                     | 0       | 0                          | Oxford / AstraZeneca                   | Sputnik V                    | 0       | Razi Cov Pars<br>SpikoGen               | COVIRan<br>Barekat<br>Covaxin<br>FAKHRAVAC<br>Sinopharm<br>Soberana 02 | 08/02/2021                                         | 16560                                                                                                  | 70206                                                                                                                            |
| Ireland                                | 4938000    | 70.9                                       | 2436                       | 311400                                                     | 63.2                       | 74.83                 | 12.26   | 2.14                       | 10.76                                  | 0                            | 0       | Novavax – <0.01                         | 0                                                                      | 28/12/2020                                         | 16957                                                                                                  | 294443                                                                                                                           |
| Country                                | Population | Population density.<br>per km <sup>2</sup> | PCR testing coverage,<br>‰ | Reported COVID-19<br>cases,<br>per 1 million<br>population | Vaccination<br>coverage. % | mRNA Vaccines (V1), % |         | Vector Vaccines<br>(V2), % |                                        |                              |         | Protein, Peptide<br>Vaccines<br>(V3), % | Whole-virion,<br>Inactivated<br>Vaccines<br>(V4), %                    | Beginning of<br>national<br>vaccination<br>company | Reported<br>COVID-19<br>cases,<br>per 1 million<br>population<br>before<br>beginning of<br>vaccination | Reported COVID-<br>19 cases,<br>Reported COVID-<br>19 cases,<br>per 1 million<br>population after<br>beginning of<br>vaccination |
|                                        |            |                                            |                            |                                                            |                            | Pfizer / BioNTech     | Moderna | Johnson &<br>Johnson       | Oxford /<br>AstraZeneca,<br>Covishield | Sputnik V<br>(Gam-COVID-Vac) | CanSino |                                         |                                                                        |                                                    |                                                                                                        |                                                                                                                                  |
| Iceland                                | 341000     | 3.4                                        | 1951                       | 511100                                                     | 86.3                       | 92.09                 | 7.81    | 0.1                        | <0.01                                  | 0                            | 0       | 0                                       | 0                                                                      | 30/12/2020                                         | 15400                                                                                                  | 495700                                                                                                                           |

|                      |            |         |       |        |      |       |       |                   |                      |           |         |                    |                                   |            |       |        |
|----------------------|------------|---------|-------|--------|------|-------|-------|-------------------|----------------------|-----------|---------|--------------------|-----------------------------------|------------|-------|--------|
| Spain                | 46755000   | 93.7    | 1964  | 256000 | 87.2 | 64.97 | 23.46 | 1.95              | 9.62                 | 0         | 0       | 0                  | 0                                 | 04/01/2021 | 42442 | 213558 |
| Italy                | 60462000   | 205.9   | 3597  | 281400 | 79.0 | 65.31 | 24.72 | 1.1               | 8.85                 | 0         | 0       | Novavax – 0.03     | 0                                 | 27/12/2020 | 34691 | 246709 |
| Kazakhstan           | 18777000   | 6.9     | 549   | 74690  | 60.4 | 0     | 0     | 0                 | 0                    | Sputnik V | 0       | 0                  | QazVac Sinopharm/Beijing          | 31/01/2021 | 12092 | 62598  |
| Canada               | 37742000   | 4.1     | 1613  | 100800 | 86.7 | 68.36 | 28.26 | 0.03              | 3.35                 | 0         | 0       | Novavax – <0.01    | 0                                 | 14/12/2020 | 12017 | 88783  |
| Cyprus               | 1207000    | 129.7   | 32860 | 552200 | 56.5 | 71.98 | 11.43 | 1.79              | 14.79                | 0         | 0       | Novavax – <0.01    | 0                                 | 06/01/2021 | 29284 | 522916 |
| Kyrgyzstan           | 6524000    | 33.5    | NA    | 30763  | 58.3 | 0     | 0     | 0                 | 0                    | 16.6      | 0       | EpiVacCorona – 5.5 | Sinopharm                         | 28/03/2021 | 954   | 29809  |
| Kiribati             | 119000     | 145.2   | NA    | 3098   | 50.8 | 0     | 0     | 0                 | 100                  | 0         | 0       | 0                  | 0                                 | 01/06/2021 | 0     | 3098   |
| China                | 1439324000 | 152.7   | 6380  | 617    | 88   | 0     | 0     | 0                 | 0                    | 0         | CanSino | 0                  | IMBCAMS KCONVAC Sinovac Sinopharm | 10/06/2021 | 81    | 536    |
| Union of the Comoros | 870000     | 457.2   | NA    | 9287   | 34.6 | 0     | 0     | 0                 | Oxford / AstraZeneca | 0         | 0       | 0                  | Covaxin Sinopharm                 | 21/04/2021 | 4567  | 4720   |
| Cuba                 | 11327000   | 106.5   | NA    | 98577  | 87.7 | 0     | 0     | 0                 | 0                    | 0         | 0       | Abdala             | Soberana 02 Soberana Plus         | 12/05/2021 | 10640 | 87937  |
| Curaçao              | 164000     | 368.1   | 134   | 274301 | 64   | 100   |       | 0                 | 0                    | 0         | 0       | 0                  | 0                                 | 29/05/2021 | 64188 | 210113 |
| Latvia               | 1886000    | 30.7    | 3851  | 432900 | 20.1 | 56.04 | 24.72 | 10.16             | 9.07                 | 0         | 0       | Novavax – 0.01     | Sinovac – <0.01 Sinopharm – <0.01 | 04/12/2020 | 11516 | 421384 |
| Lesotho              | 2142000    | 70      | 209   | 16593  | 34.3 | 0     | 0     | Johnson & Johnson | Oxford / AstraZeneca | 0         | 0       | 0                  | Sinopharm                         | 09/03/2021 | 4565  | 12028  |
| Liberia              | 5058000    | 51.3    | NA    | 1666   | 28.4 | 0     | 0     | 0                 | 100                  | 0         | 0       | 0                  | 0                                 | 12/05/2021 | 403   | 1263   |
| Lithuania            | 2722000    | 44      | 3227  | 379500 | 56.8 | 74.04 | 7.35  | 6.61              | 12                   | 0         | 0       | 0                  | 0                                 | 27/12/2020 | 48806 | 330694 |
| Liechtenstein        | 38000      | 237.6   | NA    | 446600 | 70.7 | 31.36 | 68.25 | 0.39              | 0                    | 0         | 0       | 0                  | 0                                 | 21/12/2020 | 48100 | 398500 |
| Luxembourg           | 626000     | 237.7   | 6692  | 396800 | 80.1 | 60.71 | 26.63 | 3.57              | 9.05                 | 0         | 0       | Novavax – 0.03     | 0                                 | 28/12/2020 | 59269 | 337531 |
| Mauritius            | 1272000    | 625.5   | 1007  | 177508 | 76.1 | 0     | 0     | 0                 | Oxford / AstraZeneca | 0         | 0       | 0                  | Covaxin Sinopharm                 | 25/01/2021 | 437   | 177072 |
| Mauritania           | 4650000    | 4.4     | 201   | 14482  | 23.3 | 0     | 0     | 0                 | Oxford / AstraZeneca | 0         | 0       | 0                  | Sinopharm                         | 26/03/2021 | 3747  | 10735  |
| Madagascar           | 27691000   | 46.4    | 15    | 2450   | 4.2  | 0     | 0     | Johnson & Johnson | Oxford / AstraZeneca | 0         | 0       | 0                  | Sinopharm                         | 12/05/2021 | 1334  | 1116   |
| Malawi               | 19130000   | 197.6   | 29    | 4492   | 6    | 0     | 0     | 100               |                      | 0         | 0       | 0                  | 0                                 | 17/03/2021 | 1612  | 2880   |
| Mali                 | 20251000   | 16.1    | 33    | 1555   | 5.3  | 0     | 0     | 0                 | 100                  | 0         | 0       | 0                  | 0                                 | 30/03/2021 | 439   | 1116   |
| Malta                | 525285     | 1376.2  | 3693  | 188900 | 96.1 | 58.29 | 20.66 | 2.62              | 18.44                | 0         | 0       | 0                  | 0                                 | 17/01/2021 | 30073 | 158827 |
| Mozambique           | 31255000   | 38.6    | 41    | 7503   | 44.8 | 0     | 0     | Johnson & Johnson | Oxford / AstraZeneca | 0         | 0       | 0                  | Sinopharm                         | 07/03/2021 | 1885  | 5618   |
| Monaco               | 39000      | 26152.3 | NA    | 316554 | 65.4 | 100   | 0     | 0                 | 0                    | 0         | 0       | 0                  | 0                                 | 04/03/2021 | 49903 | 266651 |
| Montserrat           | 5000       | 49.9    | NA    | 195105 | 36.6 | 0     | 0     | 0                 | 100                  | 0         | 0       | 0                  | 0                                 | 08/02/2021 | 3852  | 191253 |
| Myanmar              | 54410000   | 82.7    | 148   | 11286  | 44.7 | 0     | 0     | 0                 | Oxford / AstraZeneca | 0         | 0       | 0                  | Sinopharm                         | 26/01/2021 | 2560  | 8726   |
| Nepal                | 29137000   | 199.6   | 231   | 32600  | 74.6 | 1.47  | 13.95 | 8.31              | 29.7                 | 0         | 0       | 0                  | Sinopharm – 46.58                 | 01/02/2021 | 8880  | 23720  |
| Niger                | 24207000   | 18.4    | 10    | 405    | 6.4  | 0     | 0     | 0                 | Oxford / AstraZeneca | 0         | 0       | 0                  | Sinopharm                         | 28/03/2021 | 190   | 215    |

| Nigeria                  | 206140000  | 220.7                                   | 24                      | 1242                                              | 8.2                     | 0                     | 0       | 0                       | 100                              | 0                         | 0       | 0                                 | 0                                                     | 04/03/2021                                | 721                                                                               | 521                                                                                                       |
|--------------------------|------------|-----------------------------------------|-------------------------|---------------------------------------------------|-------------------------|-----------------------|---------|-------------------------|----------------------------------|---------------------------|---------|-----------------------------------|-------------------------------------------------------|-------------------------------------------|-----------------------------------------------------------------------------------|-----------------------------------------------------------------------------------------------------------|
| Netherlands              | 17135000   | 507                                     | 1781                    | 467829                                            | 73.0                    | 67.04                 | 23.4    | 2.23                    | 7.32                             | 0                         | 0       | Novavax – <0.01                   | 0                                                     | 08/01/2021                                | 47207                                                                             | 420622                                                                                                    |
| New Caledonia            | 285000     | 15.5                                    | NA                      | 218462                                            | 66.2                    | 100                   | 0       | 0                       | 0                                | 0                         | 0       | 0                                 | 0                                                     | 02/02/2021                                | 162                                                                               | 218300                                                                                                    |
| Norway                   | 5421000    | 14.7                                    | 2031                    | 266730                                            | 77.4                    | 78.56                 | 20.07   | 0.06                    | 1.31                             | 0                         | 0       | 0                                 | 0                                                     | 02/12/2020                                | 6815                                                                              | 259915                                                                                                    |
| Cook Islands             | 18000      | 73.1                                    | NA                      | 237                                               | 84.1                    | 100                   | 0       | 0                       | 0                                | 0                         | 0       | 0                                 | 0                                                     | 25/05/2021                                | 0                                                                                 | 237                                                                                                       |
| Turks and Caicos Islands | 39000      | 40.2                                    | NA                      | 147381                                            | 76.1                    | 100                   | 0       | 0                       | 0                                | 0                         | 0       | 0                                 | 0                                                     | 10/01/2021                                | 21104                                                                             | 126277                                                                                                    |
| Papua New Guinea         | 8947000    | 19.4                                    | NA                      | 4970                                              | 3                       | 0                     | 0       | 0                       | 100                              | 0                         | 0       | 0                                 | 0                                                     | 30/03/2021                                | 591                                                                               | 4379                                                                                                      |
| Peru                     | 32972000   | 25.4                                    | 875                     | 111100                                            | 87                      | 60.6                  | 0.8     | 0                       | 10.7                             | 0                         | 0       | 0                                 | Sinopharm – 27.9                                      | 09/02/2021                                | 34670                                                                             | 76430                                                                                                     |
| Poland                   | 37847000   | 123.7                                   | 972                     | 156400                                            | 58.4                    | 76.94                 | 7.22    | 5.35                    | 10.47                            | 0                         | 0       | Novavax – 0.02                    | 0                                                     | 28/12/2020                                | 31890                                                                             | 124510                                                                                                    |
| Portugal                 | 10197000   | 111.7                                   | 4106                    | 390700                                            | 85.6                    | 68.42                 | 16.29   | 5.1                     | 10.15                            | 0                         | 0       | Novavax – <0.01                   | Covaxin – <0.01<br>Sinovac – 0.02<br>Sinopharm – 0.01 | 01/01/2021                                | 36756                                                                             | 353944                                                                                                    |
| Country                  | Population | Population density, per km <sup>2</sup> | PCR testing coverage, ‰ | Reported COVID-19 cases, per 1 million population | Vaccination coverage, % | mRNA Vaccines (V1), % |         | Vector Vaccines (V2), % |                                  |                           |         | Protein, Peptide Vaccines (V3), % | Whole-virion, Inactivated Vaccines (V4), %            | Beginning of national vaccination company | Reported COVID-19 cases, per 1 million population before beginning of vaccination | Reported COVID-19 cases, Reported COVID-19 cases, per 1 million population after beginning of vaccination |
|                          |            |                                         |                         |                                                   |                         | Pfizer / BioNTech     | Moderna | Johnson & Johnson       | Oxford / AstraZeneca, Covishield | Sputnik V (Gam-COVID-Vac) | CanSino |                                   |                                                       |                                           |                                                                                   |                                                                                                           |
| Russia                   | 145934000  | 8.9                                     | 2001                    | 122871                                            | 51.1                    | 0                     | 0       | 0                       | 0                                | 95.5%                     | 0       | EpiVacCorona – 3.3%               | CoviVac – 1.2%                                        | 15/12/2020                                | 18895                                                                             | 103976                                                                                                    |
| Romania                  | 19238000   | 84.1                                    | NA                      | 149500                                            | 41.5                    | 76.73                 | 6       | 12.22                   | 5.06                             | 0                         | 0       | 0                                 | 0                                                     | 27/12/2020                                | 31220                                                                             | 118280                                                                                                    |
| Samoa                    | 198000     | 69.6                                    | NA                      | 106014                                            | 94.2                    | 0                     | 0       | 0                       | 100                              | 0                         | 0       | 0                                 | 0                                                     | 04/05/2021                                | 5                                                                                 | 106009                                                                                                    |
| Sao Tome and Principe    | 219000     | 224                                     | 13                      | 29646                                             | 39.7                    | 0                     | 0       | 0                       | 100                              | 0                         | 0       | 0                                 | 0                                                     | 15/03/2021                                | 9138                                                                              | 20508                                                                                                     |
| Senegal                  | 16744000   | 84.6                                    | 64                      | 5099                                              | 81.7                    | 0                     | 0       | Johnson & Johnson       | Oxford / AstraZeneca             | 0                         | 0       | 0                                 | Sinopharm                                             | 22/02/2021                                | 1911                                                                              | 3188                                                                                                      |
| Seychelles               | 98000      | 212.5                                   | NA                      | 447928                                            | 81.7                    | 0                     | 0       | 0                       | Oxford / AstraZeneca             | Sputnik V                 | 0       | 0                                 | Sinopharm                                             | 09/01/2021                                | 4685                                                                              | 443243                                                                                                    |
| Slovakia                 | 5460000    | 113.5                                   | 9380                    | 466345                                            | 51.0                    | 74.62                 | 9.83    | 2.7                     | 12.29                            | 0.55                      | 0       | Novavax – 0.02                    | 0                                                     | 03/01/2021                                | 33330                                                                             | 433015                                                                                                    |
| Slovenia                 | 2079000    | 103.2                                   | 2491                    | 482193                                            | 59.0                    | 76.38                 | 8.03    | 4.61                    | 10.98                            | 0                         | 0       | Novavax – <0.01                   | 0                                                     | 27/12/2020                                | 54443                                                                             | 427750                                                                                                    |
| United States            | 331003000  | 36                                      | 2659                    | 247232                                            | 59.2                    | 59.03                 | 37.75   | 3.22                    | 0                                | 0                         | 0       | 0                                 | 0                                                     | 13/12/2020                                | 47975                                                                             | 199257                                                                                                    |
| Sierra Leone             | 7977000    | 108.2                                   | 52                      | 912                                               | 68.1                    | 0                     | 0       | 0                       | Oxford / AstraZeneca             | 0                         | 0       | 0                                 | Sinopharm                                             | 14/03/2021                                | 457                                                                               | 455                                                                                                       |
| Tajikistan               | 9538000    | 66.6                                    | 50                      | 1787                                              | 16.5                    | 9.7                   | 24.3    | 0                       | 20.2                             | 0                         | 0       | 0                                 | Sinovac – 45.8                                        | 07/05/2021                                | 1378                                                                              | 409                                                                                                       |
| Togo                     | 8279000    | 148.6                                   | 87                      | 4285                                              | 57.8                    | 0                     | 0       | 0                       | 100                              | 0                         | 0       | 0                                 | 0                                                     | 09/03/2021                                | 868                                                                               | 3417                                                                                                      |
| Uruguay                  | 3474000    | 19.8                                    | 1746                    | 265303                                            | 18.8                    | 43.03                 | 0       | 0                       | 1.55                             | 0                         | 0       | 0                                 | Sinovac – 55.42                                       | 27/02/2021                                | 16272                                                                             | 249031                                                                                                    |
| Faroe islands            | 49000      | 34.9                                    | NA                      | 664914                                            | 83.7                    | 100                   |         | 0                       | 0                                | 0                         | 0       | 0                                 | 0                                                     | 29/01/2021                                | 12369                                                                             | 652545                                                                                                    |
| Finland                  | 5541000    | 18.2                                    | 1954                    | 193500                                            | 78.8                    | 79.21                 | 16.1    | 0                       | 4.68                             | 0                         | 0       | 0                                 | 0                                                     | 03/01/2021                                | 7188                                                                              | 186312                                                                                                    |
| Falkland Islands         | 3000       | 0.3                                     | NA                      | 296237                                            | 62.5                    | 0                     | 0       | 0                       | 100                              | 0                         | 0       | 0                                 | 0                                                     | 07/02/2021                                | 12628                                                                             | 283609                                                                                                    |

|                          |           |       |      |        |      |       |       |                   |                      |   |      |                |                                                         |            |        |        |
|--------------------------|-----------|-------|------|--------|------|-------|-------|-------------------|----------------------|---|------|----------------|---------------------------------------------------------|------------|--------|--------|
| France                   | 65274000  | 118.9 | 4034 | 422000 | 79.1 | 77.39 | 16.4  | 0.75              | 5.44                 | 0 | 0    | Novavax – 0.01 | 0                                                       | 27/12/2020 | 36181  | 385819 |
| Croatia                  | 4105000   | 73.8  | 1190 | 277200 | 53.5 | 75.47 | 9.78  | 3.87              | 10.86                | 0 | 0    | Novavax – 0.02 | 0                                                       | 30/12/2020 | 51718  | 225482 |
| Central African Republic | 4830000   | 7.6   | 19   | 2665   | 20.5 | 0     | 0     | 0                 | Oxford / AstraZeneca | 0 | 0    | 0              | Covaxin                                                 | 12/05/2021 | 1908   | 757    |
| Chad                     | 16426000  | 12.7  | 13   | 457    | 12.7 | 0     | 0     | 0                 | 0                    | 0 | 0    | 0              | Sinopharm – 100                                         | 10/01/2021 | 143    | 314    |
| Czech Republic           | 10709000  | 138.4 | 5072 | 399774 | 65.1 | 83.51 | 9.07  | 2.34              | 5.04                 | 0 | 0    | Novavax – 0.04 | Covaxin – <0.01<br>Sinovac – <0.01<br>Sinopharm – <0.01 | 27/12/2020 | 64328  | 335446 |
| Chile                    | 19116000  | 25.5  | 1956 | 187900 | 96.9 | 23.26 | 1.6   | 0                 | 0                    | 0 | 0    | 0              | Sinovac – 75.14                                         | 24/12/2020 | 30265  | 157635 |
| Switzerland              | 8655000   | 217.4 | 2404 | 421098 | 71.9 | 37.21 | 62.41 | 0.39              | 0                    | 0 | 0    | 0              | 0                                                       | 21/12/2020 | 47307  | 373791 |
| Sweden                   | 10099000  | 24.5  | 1802 | 242400 | 77.1 | 74.77 | 18.94 | 0                 | 6.26                 | 0 | 0    | Novavax – 0.03 | 0                                                       | 03/01/2021 | 433596 | 198804 |
| Ecuador                  | 17643000  | 70    | 154  | 49900  | 86.4 | 28.59 | 0     | 0                 | 16.75                | 0 | 1.79 | 0              | Sinovac – 52.87                                         | 20/01/2021 | 12920  | 36980  |
| Equatorial Guinea        | 1403000   | 48.3  | 331  | 11713  | 15.3 | 0     | 0     | 0                 | 0                    | 0 | 0    | 0              | Sinovac + Sinopharm = 100                               | 16/03/2021 | 3942   | 7771   |
| Estonia                  | 1327000   | 31.3  | 2544 | 432100 | 64.0 | 73.28 | 11.43 | 3.77              | 11.48                | 0 | 0    | Novavax – 0.04 | 0                                                       | 27/12/2020 | 23400  | 408700 |
| Ethiopia                 | 114964000 | 112.1 | 41   | 7512   | 18.5 | 0     | 0     | Johnson & Johnson | Oxford / AstraZeneca | 0 | 0    | 0              | Covaxin<br>Sinovac<br>Sinopharm                         | 08/04/2021 | 1813   | 5699   |
| South Africa             | 59309000  | 48.3  | 413  | 65900  | 96.9 | 75.57 | 0     | 24.43             | 0                    | 0 | 0    | 0              | 0                                                       | 16/02/2021 | 24926  | 40974  |
| South Korea              | 51269000  | 526.8 | 1891 | 342300 | 87.7 | 62.4  | 19.72 | 1.23              | 16.26                | 0 | 0    | Novavax – 0.4  | 0                                                       | 26/02/2021 | 1730   | 340570 |
| South Sudan              | 11194000  | 18.1  | 35   | 1375   | 5.6  | 0     | 0     | 100               |                      | 0 | 0    | 0              | 0                                                       | 05/04/2021 | 942    | 433    |
| Japan                    | 126476000 | 348   | 382  | 69500  | 81.2 | 77.16 | 22.8  | 0                 | 0.04                 | 0 | 0    | 0              | 0                                                       | 17/02/2021 | 3404   | 66096  |

#### Notes:

\* Vaccines used were divided into four groups. V1 – mRNA vaccines: mRNA-1273 (Moderna), BNT162b2 (Pfizer/BioNTech). V2 – vector vaccines: Johnson & Johnson, Oxford/AstraZeneca (Covishield), Gam-COVID-Vac (Sputnik V), CanSino. V3 – protein and peptide vaccines: EpiVacCorona, Novavax. V4 – whole-virion vaccines: Sinovac, Sinopharm, Soberana, COVIran Barekat, Covaxin, FAKHRAVAC, Corbevax, QazVac, IMBCAMS, KCONVAC, CoviVac.

#### Sources:

Population number and density were taken from Country Meters Info (<https://countrymeters.info>), accessed 05/05/2022. Prevalence per 1 million population, COVID-19 vaccination coverage, and vaccine ratios were taken from: Our World in Data (<https://ourworldindata.org/>), accessed 13/05/2022; Gogov Statistics (<https://gogov.ru/articles/covid-19>), accessed 13-15/05/2022; Coronavirus Monitor Info (<https://coronavirus-monitor.info/>), accessed 10-20/05/2022; the World Health Organization (<https://covid19.who.int/>), accessed 10-20/05/2022; and the Pan American Health Organization (<https://www.paho.org/>), accessed 15-20/05/2022. See also link (<https://ourworldindata.org/grapher/covid-vaccine-doses-by-manufacturer?country>). When necessary, official information was taken from various government websites: UK Health Security Agency ([https://assets.publishing.service.gov.uk/government/uploads/system/uploads/attachment\\_data/file/1075115/COVID-19\\_vaccine\\_surveillance\\_report\\_12\\_May\\_2022\\_week\\_19.pdf](https://assets.publishing.service.gov.uk/government/uploads/system/uploads/attachment_data/file/1075115/COVID-19_vaccine_surveillance_report_12_May_2022_week_19.pdf)). # Bhutan: 1st vaccination (94% of adults) – Oxford/AstraZeneca; 2nd vaccination (90.2%) – Moderna

mRNA-1273 (Tamang S.T., Dorji T.; 'COVID-19 vaccinations in Bhutan – Mix-and-Match to Boosters: An experience'; Vaccine. 2022; 40(23): 3089–3092. doi: 10.1016/j.vaccine.2022.04.059).

**Table S2.** Data set adjusted for population and vaccination coverage (n=53).

| Country         | Population | Population density, per km <sup>2</sup> | PCR testing coverage, ‰ | Reported COVID-19 cases, per 1 million population | Vaccination coverage, % | mRNA Vaccines (V1), % |         |          | Vector Vaccines (V2), % |                                  |                           |         |          | Protein, Peptide Vaccines (V3), % |                  | Whole-virion, Inactivated Vaccines (V4), %         |          | Share of vaccine usage, % |                   | Beginning of national vaccination company | Reported COVID-19 cases, per 1 million population before beginning of vaccination | Reported COVID-19 cases, per 1 million population after beginning of vaccination |
|-----------------|------------|-----------------------------------------|-------------------------|---------------------------------------------------|-------------------------|-----------------------|---------|----------|-------------------------|----------------------------------|---------------------------|---------|----------|-----------------------------------|------------------|----------------------------------------------------|----------|---------------------------|-------------------|-------------------------------------------|-----------------------------------------------------------------------------------|----------------------------------------------------------------------------------|
|                 |            |                                         |                         |                                                   |                         | Pfizer / BioNTech     | Moderna | V1 total | Johnson & Johnson       | Oxford / AstraZeneca, Covishield | Sputnik V (Gam-COVID-Vac) | CanSino | V2 total |                                   | V3 total         |                                                    | V4 total | V1                        | Vnmg (V2+ V3+ V4) |                                           |                                                                                   |                                                                                  |
| Australia       | 25500000   | 3.3                                     | 2755                    | 266595                                            | 83.29                   | 55.37                 | 0       | 55.37    | 0                       | 44.63                            | 0                         | 0       | 44.63    | 0                                 | 0                | 0                                                  | 0        | 55.37                     | 44.63             | 21/02/2021                                | 1105                                                                              | 265490                                                                           |
| Austria         | 9006000    | 108.7                                   | 20551                   | 480347                                            | 75.8                    | 80.65                 | 8.68    | 89.33    | 1.99                    | 8.63                             | 0                         | 0       | 10.62    | Novavax – 0.05                    | 0.05             | 0                                                  | 0        | 89.33                     | 10.67             | 08/01/2021                                | 41364                                                                             | 438983                                                                           |
| Argentina       | 46403000   | 16.4                                    | 791                     | 202500                                            | 86.1                    | 17.16                 | 7.62    | 24.78    | 0                       | 26.08                            | 20.19                     | 0.78    | 47.05    | 0                                 | 0                | Sinopharm – 28.16                                  | 28.16    | 24.78                     | 75.22             | 29/12/2020                                | 36361                                                                             | 166139                                                                           |
| Belarus         | 9449000    | 46.6                                    | 1400                    | 104411                                            | 63.8                    | 0                     | 0       | 0        | 0                       | 0                                | 57.4                      | 0       | 57.4     | EpiVacc Corona – 0.3              | 0.3              | Sinovac – 0.6<br>Sinopharm – 32.3<br>CoviVac – 0.5 | 33.4     | 0                         | 100               | 28/12/2020                                | 19778                                                                             | 84633                                                                            |
| Belgium         | 11590000   | 381.1                                   | 2920                    | 357100                                            | 81.23                   | 70.15                 | 16.92   | 87.07    | 1.69                    | 11.24                            | 0                         | 0       | 12.93    | Novavax – <0.01                   | 0                | 0                                                  | 0        | 87.07                     | 12.93             | 28/12/2020                                | 54940                                                                             | 302160                                                                           |
| Bhutan #        | 772000     | 20                                      | 2170                    | 80378                                             | 90.46                   | 0                     | 50      | 50       | 0                       | 50                               | 0                         | 0       | 50       | 0                                 | 0                | 0                                                  | 0        | 50                        | 50                | 26/03/2021                                | 1113                                                                              | 79260                                                                            |
| Great Britain   | 67886000   | 279.1                                   | 7348                    | 331600                                            | 79.0                    | 48.7                  | 3       | 51.7     | 0                       | 48.3                             | 0                         | 0       | 48.3     | 0                                 | 0                | 0                                                  | 0        | 51.7                      | 48.3              | 10/01/2021                                | 46584                                                                             | 285076                                                                           |
| Hungary         | 9660000    | 107                                     | 1136                    | 195400                                            | 62.9                    | 58.63                 | 6.54    | 65.17    | 2.07                    | 7.64                             | 11.03                     | 0       | 20.74    | 0                                 | 0                | Sinopharm – 14.09                                  | 14.09    | 65.17                     | 34.83             | 18/01/2021                                | 35443                                                                             | 159957                                                                           |
| Venezuela       | 28436000   | 32.3                                    | n/d                     | 16244                                             | 50.2                    | 0                     | 0       | 0        | 0                       | 0                                | Sputnik V                 | 0       | NA       | Abdalla                           | n/d              | Sinopharm<br>Soberana 02<br>Soberana Plus          | NA       | 0                         | 100               | 17/02/2021                                | 4732                                                                              | 11512                                                                            |
| Germany         | 83784000   | 239.6                                   | 1536                    | 308600                                            | 78.5                    | 73.72                 | 17.11   | 90.83    | 2.06                    | 7.04                             | 0                         | 0       | 9.1      | Novavax – 0.07                    | 0.07             | 0                                                  | 0        | 90.83                     | 9.17              | 27/12/2020                                | 25706                                                                             | 282894                                                                           |
| China Hong Kong | 7497000    | 7082.1                                  | 5981                    | 161440                                            | 83.79                   | 58.99                 | 0       | 58.99    | 0                       | 0                                | 0                         | 0       | 0        | 0                                 | 0                | Sinovac – 41.01                                    | 41.01    | 58.99                     | 41.01             | 22/02/2021                                | NA                                                                                | 161440                                                                           |
| Denmark         | 5792000    | 136                                     | 11080                   | 538246                                            | 84.1                    | 84.27                 | 14.07   | 98.34    | 0.38                    | 1.28                             | 0                         | 0       | 1.66     | 0                                 | 0                | 0                                                  | 0        | 98.34                     | 1.66              | 18/12/2020                                | 21049                                                                             | 517197                                                                           |
| Israel          | 8656000    | 393.7                                   | 5459                    | 449351                                            | 66.6                    | 100                   |         | 100      | 0                       | 0                                | 0                         | 0       | 0        | 0                                 | 0                | 0                                                  | 0        | 100                       | 0                 | 19/12/2020                                | 39477                                                                             | 409874                                                                           |
| India           | 1380004000 | 459.6                                   | 604                     | 31708                                             | 63.9                    | 0                     | 0       | 0        | 0                       | 79.97                            | 0                         | 0       | 79.97    | 0                                 | Corbevax – 16.78 | Covaxin – 16.78                                    | 20.03    | 0                         | 100               | 15/01/2021                                | 7429                                                                              | 24279                                                                            |
| Country         | Population | Population density, per km <sup>2</sup> | PCR testing coverage, ‰ | Reported COVID-19 cases, per 1 million population | Vaccination coverage, % | mRNA Vaccines (V1), % |         |          | Vector Vaccines (V2), % |                                  |                           |         |          | Protein, Peptide Vaccines (V3), % |                  | Whole-virion, Inactivated Vaccines (V4), %         |          | Share of vaccine usage, % |                   | Beginning of national vaccination company | Reported COVID-19 cases, per 1 million population before beginning of vaccination | Reported COVID-19 cases, per 1 million population after beginning of vaccination |
|                 |            |                                         |                         |                                                   |                         | Pfizer / BioNTech     | Moderna | V1 total | Johnson & Johnson       | Oxford / AstraZeneca,            | Sputnik V (Gam-COVID-Vac) | CanSino | V2 total |                                   | V3 total         |                                                    | V4 total | V1                        | Vnmg (V2+ V3+ V4) |                                           |                                                                                   |                                                                                  |

|                 |                |        |       |        |      |       |       |       |      |                            |           |         |       |                                     |      |                                                                                    |       |       |       |                |       |        |
|-----------------|----------------|--------|-------|--------|------|-------|-------|-------|------|----------------------------|-----------|---------|-------|-------------------------------------|------|------------------------------------------------------------------------------------|-------|-------|-------|----------------|-------|--------|
|                 |                |        |       |        |      |       |       |       |      | Covishiel<br>d             |           |         |       |                                     |      |                                                                                    |       |       |       |                |       |        |
| Iran            | 83993000       | 50.9   | 607   | 86766  | 68.8 | 0     | 0     | 0     | 0    | Oxford/A<br>straZene<br>ca | Sputnik V | 0       | n/d   | Razi<br>Cov<br>Pars<br>Spiko<br>Gen | n/d  | COVIran<br>Barekat<br>Covaxin<br>FAKHRA<br>VAC<br>Sinophar<br>m<br>Soberan<br>a 02 | n/d   | 0     | 100   | 08/02/20<br>21 | 16560 | 70206  |
| Ireland         | 4938000        | 70.9   | 2436  | 311400 | 63.2 | 74.83 | 12.26 | 87.09 | 2.14 | 10.76                      | 0         | 0       | 12.9  | Novav<br>ax –<br><0.01              | 0.01 | 0                                                                                  | 0     | 87.09 | 12.91 | 28/12/20<br>20 | 16950 | 294443 |
| Spain           | 46755000       | 93.7   | 1964  | 256000 | 87.2 | 64.97 | 23.46 | 88.43 | 1.95 | 9.62                       | 0         | 0       | 11.57 | 0                                   | 0    | 0                                                                                  | 0     | 88.43 | 11.57 | 04/01/20<br>21 | 42442 | 213558 |
| Italy           | 60462000       | 205.9  | 3597  | 281400 | 79.0 | 65.31 | 24.72 | 90.03 | 1.1  | 8.85                       | 0         | 0       | 9.95  | Novav<br>ax –<br>0.03               | 0.03 | 0                                                                                  | 0     | 90.03 | 9.97  | 27/12/20<br>20 | 34691 | 246709 |
| Kazakhstan      | 18777000       | 6.9    | 549   | 74690  | 60.4 | 0     | 0     | 9.7   | 0    | 0                          | Sputnik V | 0       | NA    | 0                                   | 0    | QazVac<br>Sinophar<br>m/Beiji<br>ng                                                | NA    | 9.7   | 90.3  | 31/01/20<br>21 | 12092 | 62598  |
| Canada          | 37742000       | 4.1    | 1613  | 100800 | 86.7 | 68.36 | 28.26 | 96.62 | 0.03 | 3.35                       | 0         | 0       | 3.38  | Novav<br>ax –<br><0.01              | 0    | 0                                                                                  | 0     | 96.62 | 3.38  | 14/12/20<br>20 | 12017 | 88783  |
| Cyprus          | 1207000        | 129.7  | 32860 | 552200 | 56.5 | 71.98 | 11.43 | 83.41 | 1.79 | 14.79                      | 0         | 0       | 16.58 | Novav<br>ax –<br><0.01              | 0.01 | 0                                                                                  | 0     | 83.41 | 16.59 | 06/01/20<br>21 | 29284 | 522916 |
| Kyrgyzstan      | 6524000        | 33.5   | n/d   | 30763  | 58.3 | 0     | 0     | 0     | 0    | 0                          | 16.6      | 0       | 16.6  | EpiVa<br>cCoro<br>na –<br>5.5       | 5.5  | Sinophar<br>m – 77.9                                                               | 77.9  | 0     | 100   | 28/03/20<br>21 | 954   | 29809  |
| China           | 143932400<br>0 | 152.7  | 6380  | 617    | 88   | 0     | 0     | 0     | 0    | 0                          | 0         | CanSino | n/d   | 0                                   | 0    | IMBCAM<br>S<br>KCONV<br>AC<br>Sinovac<br>Sinophar<br>m                             | NA    | 0     | 100   | 10/06/20<br>21 | 81    | 536    |
| Cuba            | 11327000       | 106.5  | n/d   | 98577  | 87.7 | 0     | 0     | 0     | 0    | 0                          | 0         | 0       | 0     | Abdal<br>a                          | n/d  | Soberan<br>a 02<br>Soberan<br>a Plus                                               | NA    | 0     | 100   | 12/05/20<br>21 | 10640 | 87937  |
| Lithuania       | 2722000        | 44     | 3227  | 379500 | 56.8 | 74.04 | 7.35  | 81.39 | 6.61 | 12                         | 0         | 0       | 18.61 | 0                                   | 0    | 0                                                                                  | 0     | 81.39 | 18.61 | 27/12/20<br>20 | 48806 | 330694 |
| Luxembour<br>g  | 626000         | 237.7  | 6692  | 396800 | 80.1 | 60.71 | 26.63 | 87.34 | 3.57 | 9.05                       | 0         | 0       | 12.62 | Novav<br>ax –<br>0.03               | 0.03 | 0                                                                                  | 0     | 87.34 | 12.66 | 28/12/20<br>20 | 59269 | 337531 |
| Mauritius       | 1272000        | 625.5  | 1007  | 177508 | 76.1 | 0     | 0     | 0     | 0    | Oxford/A<br>straZene<br>ca | 0         | 0       | n/d   | 0                                   | 0    | Covaxin<br>Sinophar<br>m                                                           | n/d   | 0     | 100   | 25/01/20<br>21 | 437   | 177071 |
| Malta           | 525285         | 1376.2 | 3693  | 188900 | 96.1 | 58.29 | 20.66 | 78.95 | 2.62 | 18.44                      | 0         | 0       | 21.05 | 0                                   | 0    | 0                                                                                  | 0     | 78.95 | 21.05 | 17/01/20<br>21 | 30073 | 158827 |
| Nepal           | 29137000       | 199.6  | 231   | 32600  | 74.6 | 1.47  | 13.95 | 15.42 | 8.31 | 29.7                       | 0         | 0       | 38.01 | 0                                   | 0    | Sinophar<br>m –<br>46.58                                                           | 46.58 | 15.42 | 84.58 | 01/02/20<br>21 | 8880  | 23720  |
| Netherland<br>s | 17135000       | 507    | 1781  | 467829 | 73.0 | 67.04 | 23.4  | 90.44 | 2.23 | 7.32                       | 0         | 0       | 9.55  | Novav<br>ax –<br><0.01              | 0.01 | 0                                                                                  | 0     | 90.44 | 9.56  | 08/01/20<br>21 | 47207 | 420622 |
| Norway          | 5421000        | 14.7   | 2031  | 266730 | 77.4 | 78.56 | 20.07 | 98.63 | 0.06 | 1.31                       | 0         | 0       | 1.37  | 0                                   | 0    | 0                                                                                  | 0     | 98.63 | 1.37  | 02/12/20<br>20 | 6815  | 259915 |
| Peru            | 32972000       | 25.4   | 875   | 111100 | 87   | 60.6  | 0.8   | 61.4  | 0    | 10.7                       | 0         | 0       | 10.7  | 0                                   | 0    | Sinophar<br>m – 27.9                                                               | 27.9  | 61.4  | 38.6  | 09/02/20<br>21 | 34670 | 76430  |

| Poland         | 37847000   | 123.7                                   | 972                     | 156400                                            | 58.4                    | 76.94                 | 7.22    | 84.16    | 5.35                    | 10.47                            | 0                         | 0       | 15.82    | Novavax – 0.02                    | 0.02     | 0                                                       | 0        | 84.16                     | 15.84             | 28/12/2020                                | 31890                                                                             | 124510                                                                           |
|----------------|------------|-----------------------------------------|-------------------------|---------------------------------------------------|-------------------------|-----------------------|---------|----------|-------------------------|----------------------------------|---------------------------|---------|----------|-----------------------------------|----------|---------------------------------------------------------|----------|---------------------------|-------------------|-------------------------------------------|-----------------------------------------------------------------------------------|----------------------------------------------------------------------------------|
| Portugal       | 10197000   | 111.7                                   | 4106                    | 390700                                            | 85.6                    | 68.42                 | 16.29   | 84.71    | 5.1                     | 10.15                            | 0                         | 0       | 15.25    | Novavax – <0.01                   | 0        | Covaxin – <0.01<br>Sinovac – 0.02<br>Sinopharm – 0.01   | 0.04     | 84.71                     | 15.29             | 01/01/2021                                | 36756                                                                             | 353944                                                                           |
| Russia         | 145934000  | 8.9                                     | 2001                    | 122871                                            | 51.1                    | 0                     | 0       | 0        | 0                       | 0                                | 95.5%                     | 0       | 95.5     | EpiVacc Corona – 3.3%             | 3.3      | CoviVac – 1.2%                                          | 1.2      | 0                         | 100               | 15/12/2020                                | 18895                                                                             | 103976                                                                           |
| Senegal        | 16744000   | 84.6                                    | 64                      | 5099                                              | 81.7                    | 0                     | 0       | 0        | Johnson & Johnson       | Oxford/AstraZeneca               | 0                         | 0       | n/d      | 0                                 | 0        | Sinopharm                                               | n/d      | 0                         | 100               | 22/02/2021                                | 1911                                                                              | 3188                                                                             |
| Slovakia       | 5460000    | 113.5                                   | 9380                    | 466345                                            | 51.0                    | 74.62                 | 9.83    | 84.45    | 2.7                     | 12.29                            | 0.55                      | 0       | 15.54    | Novavax – 0.02                    | 0.02     | 0                                                       | 0        | 84.45                     | 15.55             | 03/01/2021                                | 33330                                                                             | 433015                                                                           |
| Slovenia       | 2079000    | 103.2                                   | 2491                    | 482193                                            | 59.0                    | 76.38                 | 8.03    | 84.41    | 4.61                    | 10.98                            | 0                         | 0       | 15.59    | Novavax – <0.01                   | 0        | 0                                                       | 0        | 84.41                     | 15.59             | 27/12/2020                                | 54443                                                                             | 427750                                                                           |
| United States  | 331003000  | 36                                      | 2659                    | 247232                                            | 59.2                    | 59.03                 | 37.75   | 96.78    | 3.22                    | 0                                | 0                         | 0       | 3.22     | 0                                 | 0        | 0                                                       | 0        | 96.78                     | 3.22              | 13/12/2020                                | 47975                                                                             | 199257                                                                           |
| Sierra Leone   | 7977000    | 108.2                                   | 52                      | 912                                               | 68.1                    | 0                     | 0       | 0        | 0                       | Oxford/AstraZeneca               | 0                         | 0       | n/d      | 0                                 | 0        | Sinopharm                                               | n/d      | 0                         | 100               | 14/03/2021                                | 457                                                                               | 455                                                                              |
| Togo           | 8279000    | 148.6                                   | 87                      | 4285                                              | 57.8                    | 0                     | 0       | 0        | 0                       | 100                              | 0                         | 0       | 100      | 0                                 | 0        | 0                                                       | 0        | 0                         | 100               | 09/03/2021                                | 868                                                                               | 3417                                                                             |
| Finland        | 5541000    | 18.2                                    | 1954                    | 193500                                            | 78.8                    | 79.21                 | 16.1    | 95.31    | 0                       | 4.68                             | 0                         | 0       | 4.68     | 0                                 | 0        | 0                                                       | 0        | 95.31                     | 4.69              | 03/01/2021                                | 7188                                                                              | 186312                                                                           |
| France         | 65274000   | 118.9                                   | 4034                    | 422000                                            | 79.1                    | 77.39                 | 16.4    | 93.79    | 0.75                    | 5.44                             | 0                         | 0       | 6.19     | Novavax – 0.01                    | 0.01     | 0                                                       | 0        | 93.79                     | 6.21              | 27/12/2020                                | 36181                                                                             | 385819                                                                           |
| Country        | Population | Population density, per km <sup>2</sup> | PCR testing coverage, ‰ | Reported COVID-19 cases, per 1 million population | Vaccination coverage, % | mRNA Vaccines (V1), % |         |          | Vector Vaccines (V2), % |                                  |                           |         |          | Protein, Peptide Vaccines (V3), % |          | Whole-virion, Inactivated Vaccines (V4), %              |          | Share of vaccine usage, % |                   | Beginning of national vaccination company | Reported COVID-19 cases, per 1 million population before beginning of vaccination | Reported COVID-19 cases, per 1 million population after beginning of vaccination |
|                |            |                                         |                         |                                                   |                         | Pfizer / BioNTech     | Moderna | V1 total | Johnson & Johnson       | Oxford / AstraZeneca, Covishield | Sputnik V (Gam-COVID-Vac) | CanSino | V2 total |                                   | V3 total |                                                         | V4 total | V1                        | Vnmg (V2+ V3+ V4) |                                           |                                                                                   |                                                                                  |
| Croatia        | 4105000    | 73.8                                    | 1190                    | 277200                                            | 53.5                    | 75.47                 | 9.78    | 85.27    | 3.87                    | 10.86                            | 0                         | 0       | 14.73    | Novavax – 0.02                    | 0.02     | 0                                                       | 0        | 85.27                     | 14.73             | 30/12/2020                                | 51718                                                                             | 225482                                                                           |
| Czech Republic | 10709000   | 138.4                                   | 5072                    | 399774                                            | 65.1                    | 83.51                 | 9.07    | 92.58    | 2.34                    | 5.04                             | 0                         | 0       | 7.38     | Novavax – 0.04                    | 0.04     | Covaxin – <0.01<br>Sinovac – <0.01<br>Sinopharm – <0.01 | 0        | 92.58                     | 7.42              | 27/12/2020                                | 64328                                                                             | 335446                                                                           |
| Chile          | 19116000   | 25.5                                    | 1956                    | 187900                                            | 96.9                    | 23.26                 | 1.6     | 24.86    | 0                       | 0                                | 0                         | 0       | 0        | 0                                 | 0        | Sinovac – 75.14                                         | 75.14    | 24.86                     | 75.14             | 24/12/2020                                | 30265                                                                             | 157635                                                                           |
| Switzerland    | 8655000    | 217.4                                   | 2404                    | 421098                                            | 71.9                    | 37.21                 | 62.41   | 100      | 0.39                    | 0                                | 0                         | 0       | 0.39     | 0                                 | 0        | 0                                                       | 0        | 100                       | 0                 | 21/12/2020                                | 47307                                                                             | 373791                                                                           |
| Sweden         | 10099000   | 24.5                                    | 1802                    | 242400                                            | 77.1                    | 74.77                 | 18.94   | 93.71    | 0                       | 6.26                             | 0                         | 0       | 6.26     | Novavax – 0.03                    | 0.03     | 0                                                       | 0        | 93.71                     | 6.29              | 03/01/2021                                | 43596                                                                             | 198804                                                                           |
| Ecuador        | 17643000   | 70                                      | 154                     | 49900                                             | 86.4                    | 28.59                 | 0       | 28.59    | 0                       | 16.75                            | 0                         | 1.79    | 18.54    | 0                                 | 0        | Sinovac – 52.87                                         | 52.87    | 28.59                     | 71.41             | 20/01/2021                                | 12920                                                                             | 36980                                                                            |
| Estonia        | 1327000    | 31.3                                    | 2544                    | 432100                                            | 64.0                    | 73.28                 | 11.43   | 84.71    | 3.77                    | 11.48                            | 0                         | 0       | 15.25    | Novavax – 0.04                    | 0.04     | 0                                                       | 0        | 84.71                     | 15.29             | 27/12/2020                                | 23400                                                                             | 408700                                                                           |

|              |           |       |      |        |      |       |       |       |       |       |   |   |       |               |     |   |   |       |       |            |       |        |
|--------------|-----------|-------|------|--------|------|-------|-------|-------|-------|-------|---|---|-------|---------------|-----|---|---|-------|-------|------------|-------|--------|
| South Africa | 59309000  | 48.3  | 413  | 65900  | 96.9 | 75.57 | 0     | 75.57 | 24.43 | 0     | 0 | 0 | 24.43 | 0             | 0   | 0 | 0 | 75.57 | 24.43 | 16/02/2021 | 24926 | 40974  |
| South Korea  | 51269000  | 526.8 | 1891 | 342300 | 87.7 | 62.4  | 19.72 | 82.12 | 1.23  | 16.26 | 0 | 0 | 17.49 | Novavax – 0.4 | 0.4 | 0 | 0 | 82.12 | 17.88 | 26/02/2021 | 1730  | 340570 |
| Japan        | 126476000 | 348   | 382  | 69500  | 81.2 | 77.16 | 22.8  | 100   | 0     | 0.04  | 0 | 0 | 0.04  | 0             | 0   | 0 | 0 | 100   | 0     | 17/02/2021 | 3404  | 66096  |

Notes: Please see notes for Table 1S.

**Table S3.** Analysis of prevalence in the compared subgroups (of Fig. 10B).

| Pairwise group comparison                   | U        | Z        | P        |
|---------------------------------------------|----------|----------|----------|
| V1>Vnmg (subgroup 1) ↔ V1≈Vnmg (subgroup 2) | 37.00000 | 2.100656 | 0.035672 |
| V1≈Vnmg (subgroup 2) ↔ V1<Vnmg (subgroup 3) | 15.00000 | 2.485497 | 0.009867 |
| V1>Vnmg (subgroup 1) ↔ V1<Vnmg (subgroup 3) | 26.00000 | 4.951293 | 0.000001 |

Abbreviations: U – Mann-Whitney test value; Z – z-score; P – statistical significance level (differences).

**Table S4.** Discriminant function analysis and classification error matrix.

| Discriminant Function Analysis: Wilks' Lambda: 0.18634; approx. F (4.92) = 30.282; $p < 0.00001$                   |                 |                     |                     |                     |          |                     |
|--------------------------------------------------------------------------------------------------------------------|-----------------|---------------------|---------------------|---------------------|----------|---------------------|
|                                                                                                                    |                 |                     |                     |                     |          |                     |
|                                                                                                                    |                 |                     |                     |                     |          |                     |
|                                                                                                                    | Wilks' - Lambda | Partial - Lambda    | F-remove - (2.46)   | p-value             | Toler.   | 1-Toler. - (R-Sqr.) |
| PCR testing coverage                                                                                               | 0.427103        | 0.436283            | 29.71807            | 0.0000001           | 0.983416 | 0.016584            |
| prevalence per 1 million people                                                                                    | 0.302642        | 0.615704            | 14.35563            | 0.000014            | 0.983416 | 0.016584            |
| Classification error matrix N = 50; (3 groups). Rows – observed classification; columns – predicted classification |                 |                     |                     |                     |          |                     |
|                                                                                                                    | Percent Correct | Group 1<br>$p=0.26$ | Group 2<br>$p=0.66$ | Group 3<br>$p=0.08$ |          |                     |
| group 1 (n=13)                                                                                                     | 84.61539        | 11                  | 2                   | 0                   |          |                     |
| group 2 (n=33)                                                                                                     | 87.87878        | 4                   | 29                  | 0                   |          |                     |
| group 3 (n=4)                                                                                                      | 75.00000        | 0                   | 1                   | 3                   |          |                     |
| TOTAL                                                                                                              | 86.00000        | 15                  | 32                  | 3                   |          |                     |

**Table S5.** Analysis of prevalence in the compared subgroups (of Fig. 10B).

| Pairwise group comparison                   | U        | Z        | P        |
|---------------------------------------------|----------|----------|----------|
| V1>Vnmg (subgroup 1) ↔ V1≈Vnmg (subgroup 2) | 21.00000 | 2.159460 | 0.027391 |



|                                             |          |          |          |
|---------------------------------------------|----------|----------|----------|
| V1≈Vnmg (subgroup 2) ↔ V1<Vnmg (subgroup 3) | 6.000000 | 1.253359 | 0.210076 |
| V1>Vnmg (subgroup 1) ↔ V1<Vnmg (subgroup 3) | 4.000000 | -3.17921 | 0.000244 |

Abbreviations: U – Mann-Whitney test value; Z – z-score; P – statistical significance level (differences).
