# Supplementary material for: COVID-19 Incidence Proportion as a Function of Regional Testing Strategy, Vaccination Coverage, and Vaccine Type
Source: MDPI journal article supplement (doi:10.3390/v15112181), 2023-10-30
Supplement: s1 [file s1]

Supplementary Figures

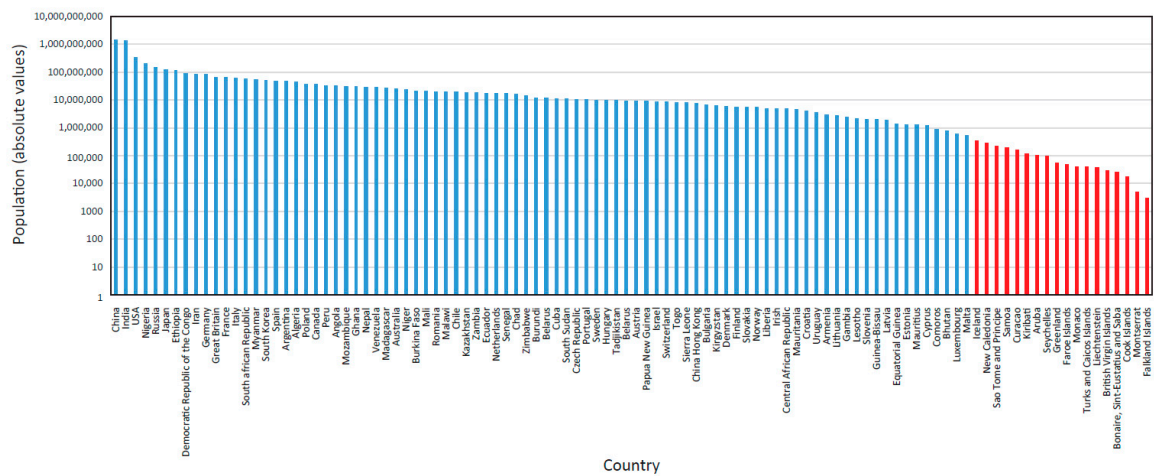

Figure S1. Distribution of countries (n=104) included in the original data set (Table S1) by population

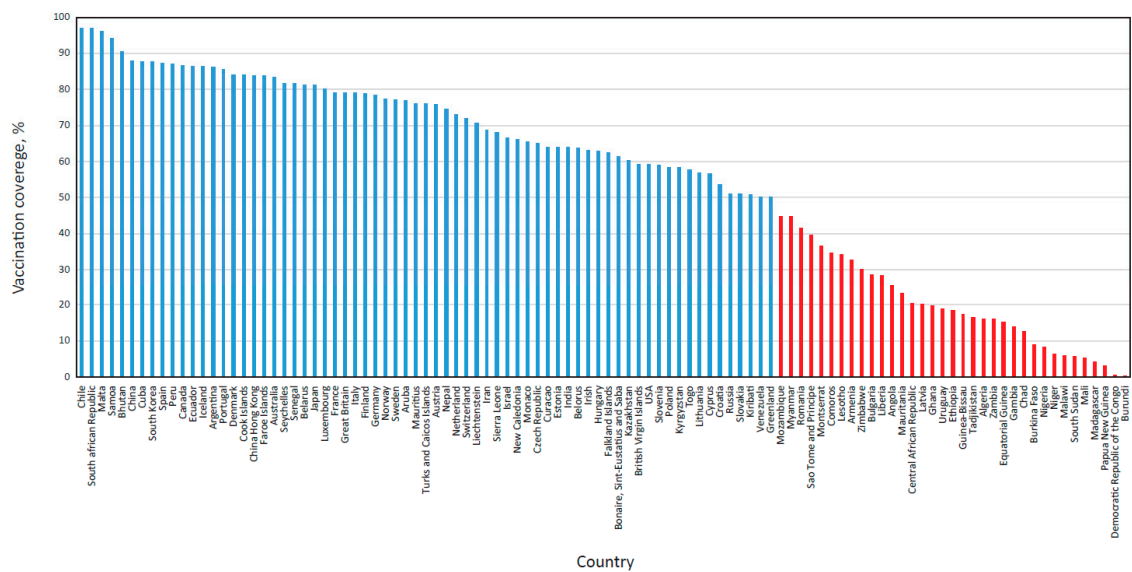

Figure S2. Distribution of countries (n=104) included in the original data set (Table S1) by vaccination coverage (%)

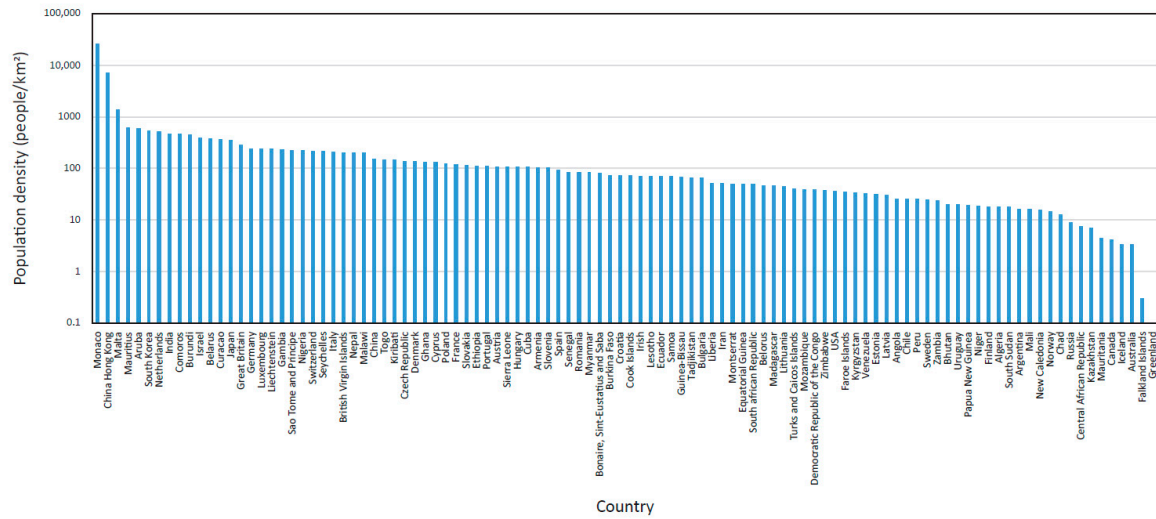

**Figure S3:** Distribution of countries (n=104) included in the original data set (Table S1) by population density (per km2)

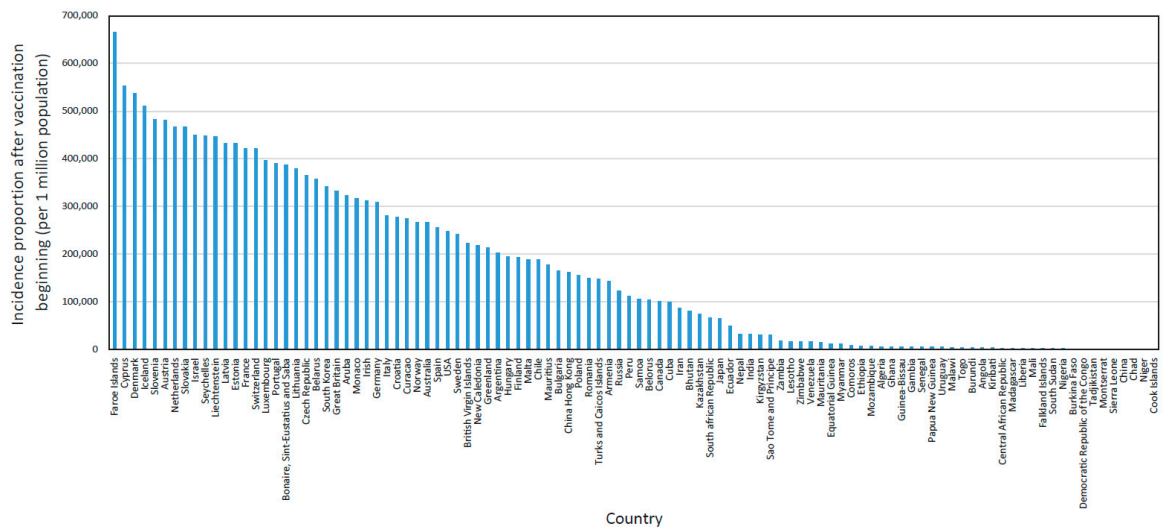

**Figure S4:** Distribution of countries (n=104) included in the original data set (Table S1) by COVID-19 incidence proportion (cumulative confirmed cases per 1 million population) after beginning of national vaccination programs.
